# Supplementary material for: Prophylactic Hydroxyurea Treatment Is Associated with Improved Cerebral Hemodynamics as a Surrogate Marker of Stroke Risk in Sickle Cell Disease: A Retrospective Comparative Analysis
Source: MDPI journal article supplement (doi:10.3390/jcm11123491), 2022-06-17
Supplement: s1 [file s1]

### **Study Methods & Results:**

**Table S1.** Study Summary Results.

| <b><u>Variable</u></b>      | <b><u>No<br/>Treatment</u></b> | <b><u>CT<br/>Treatment</u></b> | <b><u>HU<br/>Treatment</u></b> | <b><u>Total</u></b> |
|-----------------------------|--------------------------------|--------------------------------|--------------------------------|---------------------|
| Patients                    | 167                            | 70                             | 92                             | 329                 |
| Episodes                    | 1,094                          | 124                            | 252                            | 1,470               |
| Measures                    | 2,188                          | 248                            | 504                            | 2,940               |
| Episodes/<br>Patient        | 6.55                           | 1.77                           | 2.74                           | 4.47                |
| Average age<br>at Treatment | 6.92                           | 9.67                           | 8.75                           | 7.47                |
| Average<br>Measurement      | 1.69                           | 1.54                           | 1.37                           | 1.62                |

Table S1 summarizes some of the sample characteristics by treatment level: No Treatment, CT, and HU. The 329 unique patients were distributed by No Treatment (167), CT (70), and HU (92), with a maximum of ten episodes per patient, or 1,094, 124 and 252 episodes, respectively, and totaling 1,470 episodes. The average number of episodes per patient is depicted by treatment category and overall average. Each patient's TCD was measured twice at each episode, doubling the number of TCD measures. We assume that each side (denoted LR) TCD represents hemispherical stroke risk, not a repeated measure of general stroke risk.

The number of episodes varied by patient and was set to a maximum of ten episodes to assure that each treatment level was represented at each episode (i.e., at event time  $t$ ). The repeated time measures (within subject) are assumed to be correlated. Several reasonable variance-correlation structures are first estimated, the best fitting one selected before the main model effects are derived. The most general form of variance-covariance modeling (Unstructured model), requiring here a 10 episodic variances and  $n(n-1)$ , or in our case 45 unique covariances. For our data, the following matrix represents this structure:

## Variance-Covariance Matrix (SE) of Unstructured System for Repeated Time Measures

### Covariance Matrix (SE)

| Row | 01              | 02              | 03              | 04              | 05              | 06              | 07              | 08              | 09              | 10              |
|-----|-----------------|-----------------|-----------------|-----------------|-----------------|-----------------|-----------------|-----------------|-----------------|-----------------|
| 01  | 0.1189 (0.0069) |                 |                 |                 |                 |                 |                 |                 |                 |                 |
| 02  | 0.0833 (0.0062) | 0.1276 (0.0078) |                 |                 |                 |                 |                 |                 |                 |                 |
| 03  | 0.0662 (0.0059) | 0.0786 (0.0064) | 0.1066 (0.0073) |                 |                 |                 |                 |                 |                 |                 |
| 04  | 0.0581 (0.006)  | 0.063 (0.0064)  | 0.0688 (0.0063) | 0.0966 (0.0074) |                 |                 |                 |                 |                 |                 |
| 05  | 0.0522 (0.0066) | 0.0523 (0.0069) | 0.0594 (0.0068) | 0.0556 (0.0064) | 0.0860 (0.0079) |                 |                 |                 |                 |                 |
| 06  | 0.0526 (0.0081) | 0.0534 (0.0084) | 0.0517 (0.0081) | 0.0518 (0.0075) | 0.0512 (0.0072) | 0.0928 (0.01)   |                 |                 |                 |                 |
| 07  | 0.054 (0.009)   | 0.0568 (0.0096) | 0.0534 (0.0096) | 0.0534 (0.0087) | 0.0593 (0.0086) | 0.0661 (0.0092) | 0.1015 (0.0121) |                 |                 |                 |
| 08  | 0.0533 (0.0111) | 0.054 (0.0125)  | 0.0487 (0.0127) | 0.0415 (0.0118) | 0.0353 (0.0103) | 0.048 (0.0107)  | 0.0608 (0.0115) | 0.0956 (0.0154) |                 |                 |
| 09  | 0.074 (0.0143)  | 0.0792 (0.0159) | 0.0672 (0.017)  | 0.0589 (0.0156) | 0.0426 (0.0149) | 0.0527 (0.0142) | 0.0568 (0.0139) | 0.0719 (0.0157) | 0.1262 (0.0241) |                 |
| 10  | 0.1022 (0.0219) | 0.1076 (0.024)  | 0.0906 (0.0262) | 0.071 (0.022)   | 0.0956 (0.0226) | 0.0954 (0.022)  | 0.0876 (0.0218) | 0.0872 (0.0222) | 0.1004 (0.0281) | 0.2203 (0.0584) |

Since the lowest variance estimate (0.0860) times four (heuristically, about 2 standard derivations) is 0.3440, which is greater than the maximum variance estimate of 0.2203, we assume a constant variance model for the time repeated measures. At the other end of the spectrum is the compound symmetry model, which requires the estimate of only two parameters: a variance and a single covariance representing an equal correlation (or covariation) for all lags to t. The models representing intermediate positions are the Antedependent, Toeplitz and AR(1) models. All of the models were estimated under their constant variance versions. The off-diagonal correlations show no discernable or obvious pattern, though not likely a spherically constant given the mixed signs and various magnitudes. We will, therefore, test the four constant variance structures available in JMP Mixed Models for repeated time measures and select the best fitting result. These are:

The following Table YY reflects JMP mixed model goodness-of-fit measures for REML estimation of the constant variance models:

**Table S2.:** Model Fitting Results for Repeated-Measure Mixed Models.

| <u>Model</u>      | <u>-2 Residual<br/>Log Likelihood</u> | <u>-2 Log<br/>Likelihood</u> | <u>AICc</u> | <u>BIC</u> |
|-------------------|---------------------------------------|------------------------------|-------------|------------|
| Unstructured      | 362.547                               | 294.741                      | 423.544     | 797.869    |
| Compound Symmetry | 516.742                               | 448.375                      | 468.450     | 528.237    |
| Antedependent     | 555.467                               | 488.906                      | 525.140     | 632.657    |
| <b>Toeplitz</b>   | 427.324                               | 360.022                      | 396.256     | 503.773    |
| AR(1)             | 565.895                               | 499.334                      | 519.409     | 579.195    |

The AICc and BIC columns represent fit measures that penalize the use of more parameter estimates, so that even though the log likelihood measures are best (lowest) for the Unstructured model, the Toeplitz model has the best fit measures overall.

The Toeplitz modeling, which estimates a constant covariance (correlation) over a given lag, but no pattern over different lags is best fitting. Although the least-restrictive (but one with the most parameters to estimate), the Unstructured variance-covariance model provides some AICc fit, Toeplitz is better over the four fit statistic measures. The other variance-covariance models perform relatively poorly. We will therefore present our results using the Toeplitz modeling for the repeated measures (over time) for our repeated measure ANCOVA main and interaction results.

Since the TCD measure is known to decrease over time, irrespective of treatment, we used the patient's age at each episode to be a covariate, whose estimated parameter controls for this non-treatment impact on TCD. Table S1 shows the average age by treatment category as 6.92, 8.75, and 9.67 for No treatment, HU and CT, respectively, and 7.47 overall. Both HU and CT patients would be expected to be lower vis-à-vis the no treatment group base on their age at treatment alone. TCD mean differences across the treatment groups indicate that CT is significantly lower (better) than the no treatment group mean, while significantly higher than HU treatment.

#### **The Model:**

The main model (between-subject treatment), covariate and LR effects are assumed to be fixed, while the episode effect and treatment-episode interaction is

estimated within subject. Thus, we have a repeated (in time) measurement ANCOVA-like model.

We analyze the effect of treatment by taking a mixed model framework with repeated, longitudinal measures, and with patient age at episode as a covariate. We use a general linear mixed model (repeated-measure ANCOVA with LR measures taken at each episode). TCD is modeled as a function of treatment, episode time, their interaction, LR impact and age at episode covariation. More specifically:

$$y_{ijkt} = \mu + \alpha_i + \tau_t + (\alpha\tau)_{it} + \delta_{itk} + \gamma x_{ijt} + \epsilon_{ijkt}$$

for the kth measure j=1, 2 for LR of the jth patient taking TCDs at time t.  $\alpha_i$  is the treatment effect at level: 1) No treatment 2) CT, and 3) HU for patient j.  $(\alpha\tau)_{it}$  represents the interaction effect of treatment type with episode time.  $\delta_{itk}$  represents the effect of LR of treatment k=1, 2 over time episodes and treatments.  $x_{ijt}$  is the age of patient j of treatment i at time t. The error term is assumed to be unbiased and independently distributed (over time, after adjustment and patients) with a constant variance, i.e.  $\epsilon_{ijkt} \sim N(0, \sigma^2)$ .

### Model Results:

The Fixed effects results are:

#### Toeplitz Model Parameter Estimates:

| Term                                   | Estimate  | Std Error | DFDen  | t Ratio | Prob> t  | 95% Lower | 95% Upper |
|----------------------------------------|-----------|-----------|--------|---------|----------|-----------|-----------|
| Intercept                              | 1.6944367 | 0.0258755 | 1803.1 | 65.48   | <0.0001* | 1.6436876 | 1.7451858 |
| Age_Trt                                | -0.021079 | 0.0025679 | 1216.0 | -8.21   | <0.0001* | -0.026117 | -0.016041 |
| Category[No Treatment]                 | 0.13115   | 0.0106066 | 2669.0 | 12.36   | <0.0001* | 0.110352  | 0.1519481 |
| Category[CT]                           | -0.078918 | 0.0167538 | 2547.9 | -4.71   | <0.0001* | -0.111771 | -0.046066 |
| E_num                                  | -0.005671 | 0.0043231 | 852.8  | -1.31   | 0.1899   | -0.014156 | 0.0028138 |
| (E_num-3.63197)*Category[No Treatment] | 0.0188382 | 0.0037312 | 1415.6 | 5.05    | <0.0001* | 0.011519  | 0.0261574 |
| (E_num-3.63197)*Category[CT]           | -0.012974 | 0.0060161 | 1464.5 | -2.16   | 0.0312*  | -0.024775 | -0.001173 |
| RorL[L]                                | 0.0139051 | 0.0112407 | 549.3  | 1.24    | 0.2166   | -0.008175 | 0.0359851 |

All terms are significant at traditional levels except for the time period and LR effects, though time period and treatment categories significantly interact. As suspected the parameter estimate for age at treatment is negative. This characterization is confirmed by the following more summarized table of fixed effects.

## Fixed Effects Tests

| Source         | Nparm | DFNum | DFDen  | F Ratio   | Prob > F |
|----------------|-------|-------|--------|-----------|----------|
| Age_Tr         | 1     | 1     | 1235.2 | 66.449001 | <0.0001* |
| Category       | 2     | 2     | 2603.1 | 79.317771 | <0.0001* |
| E_num          | 1     | 1     | 859.9  | 1.9386715 | 0.1642   |
| E_num*Category | 2     | 2     | 1121.6 | 13.137271 | <0.0001* |
| RorL           | 1     | 1     | 561.0  | 1.6752726 | 0.1961   |

The least squares Means estimates of treatment levels is different from the average treatment effects presented in Table S1, where HU (1.37) was significantly lower than CT (1.54), and both were significantly lower than the No Treatment group average of 1.69.

## Multiple Comparisons for Category Least Squares Means Estimates

| Category     | Estimate  | Std Error  | DF     | Lower 95% | Upper 95% |
|--------------|-----------|------------|--------|-----------|-----------|
| No Treatment | 1.6475659 | 0.01223064 | 688.64 | 1.6235520 | 1.6715797 |
| CT           | 1.4374975 | 0.02542980 | 2590.3 | 1.3876327 | 1.4873623 |
| HU           | 1.4641842 | 0.01871844 | 1681.4 | 1.4274703 | 1.5008981 |

The plot of these least square mean differences is depicted as follows:

## Mean MCA TMAX Velocities, Controlled for age

### Least Squares Means Plot

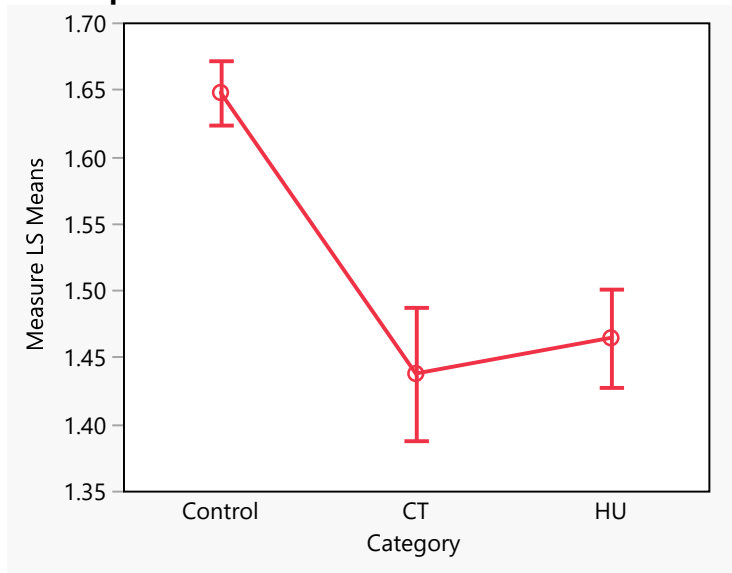

**Figure S1.:** Graphic depiction of least squares means estimates for the three treatment groups, accounting for age as a covariate. MCA TMAX values as measured by TCDs.

The mean difference plots indicate that both CT and HU treatments are better than the no treatment group. CT appear to have insignificantly lower (better) results, but also has higher dispersion of results. The following post-hoc Tukey pairwise mean differences similarly indicate that, although both treatment modes are better than No Treatment, they are not significantly different from one another. Given this indifference, cost and patient invasiveness considerations should dictate the clinical choice.

### Tukey HSD All Pairwise Comparisons

Quantile = 2.34506, Adjusted DF = 2573.9, Adjustment = Tukey-Kramer

#### All Pairwise Differences

| Category     | -Category | Difference | Std Error | t Ratio | Prob> t  | Lower 95% | Upper 95% |
|--------------|-----------|------------|-----------|---------|----------|-----------|-----------|
| No Treatment | CT        | 0.210068   | 0.0242782 | 8.65    | <0.0001* | 0.153135  | 0.2670022 |
| No Treatment | HU        | 0.183382   | 0.0183906 | 9.97    | <0.0001* | 0.140255  | 0.2265086 |
| CT           | HU        | -0.026687  | 0.0290307 | -0.92   | 0.6281   | -0.094765 | 0.0413921 |

Filename: jcm-1761335-supplementary.docx  
Directory: E:\6.17\remotesensing-1722081  
Template: C:\Users\MDPI\AppData\Roaming\Microsoft\Templates\Normal.  
dotm  
Title:  
Subject:  
Author: Joe Callaghan  
Keywords:  
Comments:  
Creation Date: 6/16/2022 11:25:00 PM  
Change Number: 3  
Last Saved On: 6/17/2022 1:43:00 PM  
Last Saved By: MDPI  
Total Editing Time: 12 Minutes  
Last Printed On: 6/17/2022 5:32:00 PM  
As of Last Complete Printing  
Number of Pages: 6  
Number of Words: 1,516 (approx.)  
Number of Characters: 8,627 (approx.)
